# Supplementary material for: Transcriptome Profiling-Based Analysis of Carbohydrate-Active Enzymes in Aspergillus terreus Involved in Plant Biomass Degradation
Source: Front Bioeng Biotechnol. 2020 Oct 6;8:564527. doi: 10.3389/fbioe.2020.564527 (PMC7573219; doi:10.3389/fbioe.2020.564527)
Supplement: Supplementary Table 3 — Transcription factor genes in Aspergillus terreus BLU24 differentially expressed on SB and SH in comparison to equivalent growth treatments with glucose as carbon source. [file Table_3.XLSX]

## Sheet: Sheet1
SUPPLEMENTARY TABLE 3. Transcription factor genes in Aspergillus terreus BLU24 differentially expressed on SB and SH in comparison to equivalent growth treatments with glucose as carbon source (log2 fold change (FC) ≥2-fold, probability level of p ≤0.01)
ID	SB36_X_G36	SH36_X_G36	SB48_X_G48	SH48_X_G48	Genome Annotation	Annotation
	log2FC	log2FC	log2FC	log2FC
ATEG_00178	-0.270304	-2.15537	-0.982616	-2.81756	C2H2 transcription factor, putative	PF00096	Zinc finger, C2H2 type	IPR013087	Zinc finger C2H2-type	GO:0003676
ATEG_00722	-0.891457	1.32574	1.55877	2.62629	C6 transcription factor (AmyR), putative	PF00172	Fungal Zn(2)-Cys(6) binuclear cluster domain	IPR001138	Zn(2)-C6 fungal-type DNA-binding domain	GO:0000981|GO:0005634|GO:0006355|GO:0008270
ATEG_04371	2.59386	-1.56919			C6 transcription factor, putative	cd12148	fungal_TF_MHR
ATEG_04652	2.18739	-0.336693	1.61904	1.44585	CP2 transcription factor	PF04516	CP2 transcription factor	IPR007604	CP2 transcription factor
ATEG_04664	2.02673	-0.388632	0.845311	0.835563	bZIP transcription factor (AtfA)	PF00170	bZIP transcription factor	IPR004827	Basic-leucine zipper domain	GO:0003700|GO:0006355
ATEG_04790	-3.30241	-0.792976	-1.98621	-2.15457	C6 transcription factor (Ctf1B)	SM00906		IPR007219	Transcription factor domain, fungi	GO:0003677|GO:0005634|GO:0006351|GO:0008270
ATEG_05057	0.753429	-2.38059	0.431306	1.07475	C6 transcription factor	PF00172	Fungal Zn(2)-Cys(6) binuclear cluster domain	IPR001138	Zn(2)-C6 fungal-type DNA-binding domain	GO:0000981|GO:0005634|GO:0006355|GO:0008270
ATEG_05582	0.328736	0.156124	2.59098	1.98034	Zn(II)2Cys6 transcription factor	SM00906		IPR007219	Transcription factor domain, fungi	GO:0003677|GO:0005634|GO:0006351|GO:0008270
ATEG_05881	-0.909164	-0.239303	-1.68689	-2.27742	C6 transcription factor, putative	PF00172	Fungal Zn(2)-Cys(6) binuclear cluster domain	IPR001138	Zn(2)-C6 fungal-type DNA-binding domain	GO:0000981|GO:0005634|GO:0006355|GO:0008270
ATEG_05926	0.846943	1.01671	0.885878	2.6582	C6 transcription factor, putative	PF00172	Fungal Zn(2)-Cys(6) binuclear cluster domain	IPR001138	Zn(2)-C6 fungal-type DNA-binding domain	GO:0000981|GO:0005634|GO:0006355|GO:0008270
ATEG_08424	-1.79146	-1.16008	-6.0279	-6.23829	C6 transcription factor, putative	PF00172	Fungal Zn(2)-Cys(6) binuclear cluster domain	IPR001138	Zn(2)-C6 fungal-type DNA-binding domain	GO:0000981|GO:0005634|GO:0006355|GO:0008270
ATEG_08961	-1.71596	0.853591	-2.06233	-2.02219	Zn(II)2Cys6 transcription factor	mobidb-lite	consensus disorder prediction
ATEG_09030	-1.3284	-0.610945	-1.79941	-2.21188	C6 transcription factor, putative	SM00906		IPR007219	Transcription factor domain, fungi	GO:0003677|GO:0005634|GO:0006351|GO:0008270
ATEG_10323	5.53022	-3.12241	2.36743	4.02063	Zn_clus Fungal Zn(2)-Cys(6) binuclear cluster domain containg protein	PF00172	Fungal Zn(2)-Cys(6) binuclear cluster domain	IPR001138	Zn(2)-C6 fungal-type DNA-binding domain	GO:0000981|GO:0005634|GO:0006355|GO:0008270
ATEG_10358	2.06699	-0.0763693	2.01092	1.82535	C6 transcription factor, putative	PF00172	Fungal Zn(2)-Cys(6) binuclear cluster domain	IPR001138	Zn(2)-C6 fungal-type DNA-binding domain	GO:0000981|GO:0005634|GO:0006355|GO:0008270
			c

## Sheet: Sheet2
All transcription factor genes in Aspergillus terreus BLU24 differentially expressed on SB and SH in comparison to equivalent growth treatments with glucose as carbon source
	log2 fold change (FC) <2-fold, probability level of p ≤0.01
	SB36_X_G36		SH36_X_G36		SB48_X_G48		SH48_X_G48
ID	log2FC	padj	log2FC	padj	log2FC	padj	log2FC	padj	Genome Annotation	Annotation
ATEG_00057	0.0438944	0.890778	-0.622885	0.103866	0.780895	0.0498937	0.0586292	0.949387	unnamed protein product	cd12148	fungal_TF_MHR
ATEG_00079	0.79439	0.00499168	-0.983753	0.00123239	0.737258	0.036047	1.78763	0.000481586	C6 transcription factor	PF00172	Fungal Zn(2)-Cys(6) binuclear cluster domain	IPR001138	Zn(2)-C6 fungal-type DNA-binding domain	GO:0000981|GO:0005634|GO:0006355|GO:0008270
ATEG_00133	0.88409	0.00537223	-0.380698	0.369704	0.7919	0.0498937	0.0802955	0.992507	DNA repair protein RAD5
ATEG_00178	-2.81756	1.56e-20	-2.15537	3.5e-11	-0.982616	0.0197759	-0.270304	0.920607	hypothetical protein	PF00096	Zinc finger, C2H2 type	IPR013087	Zinc finger C2H2-type	GO:0003676
ATEG_00214	-0.235129	0.534164	-0.538419	0.227132	0.125913	0.839066	0.098767	0.919439	C2H2 transcription factor (TFIIIA)	PF00096	Zinc finger, C2H2 type	IPR013087	Zinc finger C2H2-type	GO:0003676
ATEG_00246	0.719753	0.0951176	0.0727262	0.9268	0.915707	0.073591	0.308261	0.81019	unnamed protein product	PF00808	Histone-like transcription factor (CBF/NF-Y) and archaeal histone	IPR003958	Transcription factor CBF/NF-Y/archaeal histone domain
ATEG_00250	-0.233023	0.463921	-1.0613	0.000531046	-0.352337	0.525718	0.275544	0.698192	bZIP transcription factor (Fcr3)	mobidb-lite	consensus disorder prediction
ATEG_00268	-0.523915	0.11354	1.00501	0.130886	-0.305256	0.512827	0.0122844	0.98245	C6 transcription factor	PF03914	CBF/Mak21 family	IPR005612	CCAAT-binding factor
ATEG_00344	1.21277	0.00130467	0.114581	0.864946	1.07591	0.0259101	0.605305	0.545259	Zn(II)2Cys6 transcription factor	SM00906		IPR007219	Transcription factor domain, fungi	GO:0003677|GO:0005634|GO:0006351|GO:0008270
ATEG_00373	-0.604478	0.199736	-0.0329653	0.998659	-0.890996	0.132712	-0.564751	0.668297	unnamed protein product	PF00010	Helix-loop-helix DNA-binding domain	IPR011598	Myc-type, basic helix-loop-helix (bHLH) domain	GO:0046983
ATEG_00431	-0.682491	0.0143017	-0.0141791	0.988071	-0.526309	0.152436	-0.617982	0.669975	predicted protein	PF13771	PHD-like zinc-binding domain
ATEG_00446	-0.635354	0.0311128	-0.279284	0.494563	-0.33763	0.366504	0.0887349	0.915466	conserved hypothetical protein	PF01833	IPT/TIG domain	IPR002909	IPT domain
ATEG_00500	-1.12897	2.02e-05	-0.137575	0.792019	-0.758958	0.0309473	-0.510735	0.768977	Zn(II)2Cys6 transcription factor	PF17017	Aberrant zinc-finger	IPR031514	Aberrant zinc-finger domain
ATEG_00532	-0.482246	0.176522	0.100435	0.879166	-0.402023	0.392499	-0.584717	0.497175	bZIP transcription factor CpcA	PF11905	Domain of unknown function (DUF3425)	IPR021833	Protein of unknown function DUF3425
ATEG_00582	-0.763703	0.00269546	-0.390115	0.484241	-0.761712	0.0163348	-0.720964	0.823381	C6 transcription factor	PF00096	Zinc finger, C2H2 type	IPR013087	Zinc finger C2H2-type	GO:0003676
ATEG_00603	-0.199691	0.611806	-0.525732	0.158782	-0.0978407	0.858315	0.332336	0.633445	pH-response transcription factor pacC/RIM101	PF02269	Transcription initiation factor IID, 18kD subunit	IPR003195	Transcription initiation factor IID, subunit 13	GO:0006366
ATEG_00619	1.22046	0.00701992	-0.374352	0.522286	1.21421	0.038509	-0.0232374	0.941283	unnamed protein product	mobidb-lite	consensus disorder prediction
ATEG_00627	0.236464	0.470997	0.466984	0.222984	0.312055	0.455891	-0.333356	0.679313	Zn(II)2Cys6 transcription factor	PF08172	CASP C terminal	IPR012955	CASP, C-terminal	GO:0006891|GO:0030173
ATEG_00638	0.198778	0.683178	-0.728928	0.113226	0.559109	0.346457	-0.64437	0.363029	MADS box transcription factor Mcm1	PF00172	Fungal Zn(2)-Cys(6) binuclear cluster domain	IPR001138	Zn(2)-C6 fungal-type DNA-binding domain	GO:0000981|GO:0005634|GO:0006355|GO:0008270
ATEG_00690	0.128308	0.74307	-0.297928	0.50315	0.0563	0.930344	0.0450937	0.9781	predicted protein	PF03153	Transcription factor IIA, alpha/beta subunit	IPR004855	Transcription factor IIA, alpha/beta subunit	GO:0005672|GO:0006367
ATEG_00691	0.174417	0.528371	0.235038	0.584235	-0.15558	0.727365	0.285616	0.768591	Zn(II)2Cys6 transcription factor	PS00028	Zinc finger C2H2 type domain signature.	IPR013087	Zinc finger C2H2-type
ATEG_00707	0.372823	0.168845	0.737773	0.0186741	-0.042306	0.912256	-0.577012	0.743379	C2H2 transcription factor (AmdA)	PF00046	Homeodomain	IPR001356	Homeobox domain	GO:0003677
ATEG_00722	2.62629	6.67e-20	1.32574	9.19e-06	1.55877	7.06e-05	-0.891457	0.690484	fungal specific transcription factor domain protein	PF00172	Fungal Zn(2)-Cys(6) binuclear cluster domain	IPR001138	Zn(2)-C6 fungal-type DNA-binding domain	GO:0000981|GO:0005634|GO:0006355|GO:0008270
ATEG_00728	1.54968	6.23e-07	-0.457962	0.26548	1.17919	0.0174159	1.63805	0.00442737	APSES transcription factor	PF05920	Homeobox KN domain	IPR008422	Homeobox KN domain	GO:0003677|GO:0006355
ATEG_00757	-0.362035	0.486042			-0.319011	0.656809	-1.18278	0.1007	hypothetical protein	PF00172	Fungal Zn(2)-Cys(6) binuclear cluster domain	IPR001138	Zn(2)-C6 fungal-type DNA-binding domain	GO:0000981|GO:0005634|GO:0006355|GO:0008270
ATEG_00770	-0.744337	0.00620767	0.902085	0.0955318	-1.17396	0.00014463	-0.771238	0.635284	stress response regulator/HFS transcription factor	PF00172	Fungal Zn(2)-Cys(6) binuclear cluster domain	IPR001138	Zn(2)-C6 fungal-type DNA-binding domain	GO:0000981|GO:0005634|GO:0006355|GO:0008270
ATEG_00829	0.0739934	0.880057	-0.253983	0.665381	0.154972	0.836409	-0.91396	0.222426	C6 transcription factor (Acr-2)	PF00172	Fungal Zn(2)-Cys(6) binuclear cluster domain	IPR001138	Zn(2)-C6 fungal-type DNA-binding domain	GO:0000981|GO:0005634|GO:0006355|GO:0008270
ATEG_00855	0.745063	0.0262904	-1.64547	5.38e-05	0.628901	0.512872	1.73882	0.00105868	nitrogen regulatory protein tamA	PF00172	Fungal Zn(2)-Cys(6) binuclear cluster domain	IPR001138	Zn(2)-C6 fungal-type DNA-binding domain	GO:0000981|GO:0005634|GO:0006355|GO:0008270
ATEG_00926	0.286929	0.601822	0.246567	0.695496	0.267978	0.682563	-0.635324	0.48633	unnamed protein product	mobidb-lite	consensus disorder prediction
ATEG_00942	-0.878571	0.292099	0.0488517	0.955932	-1.53722	0.0234487	-0.164984	0.929481	transcription factor/CCAAT displacement protein	PF00172	Fungal Zn(2)-Cys(6) binuclear cluster domain	IPR001138	Zn(2)-C6 fungal-type DNA-binding domain	GO:0000981|GO:0005634|GO:0006355|GO:0008270
ATEG_00951	-0.413427	0.267586	0.145419	0.819777	0.00335033	0.997903	-0.588426	0.561708	transcription factor TFIIE complex alpha subunit	PF00172	Fungal Zn(2)-Cys(6) binuclear cluster domain	IPR001138	Zn(2)-C6 fungal-type DNA-binding domain	GO:0000981|GO:0005634|GO:0006355|GO:0008270
ATEG_01064	-0.844117	0.00397042	0.182383	0.702637	-0.814704	0.0289639	-1.01875	0.645998	C6 transcription factor	PF00808	Histone-like transcription factor (CBF/NF-Y) and archaeal histone	IPR003958	Transcription factor CBF/NF-Y/archaeal histone domain
ATEG_01096	-0.53413	0.366852	0.568732	0.207051	-0.861896	0.101256	-0.499849	0.665953	transcription factor with C2H2 and Zn(2)-Cys(6) DNA binding domain	SM00906		IPR007219	Transcription factor domain, fungi	GO:0003677|GO:0005634|GO:0006351|GO:0008270
ATEG_01144	0.892408	0.0197725	-0.0400969	0.963877	0.715889	0.171419	0.329446	0.748653	C6 transcription factor	mobidb-lite	consensus disorder prediction
ATEG_01166	0.0231836	0.878226	0.282845	0.525684	-0.352108	0.423609	0.065257	1	unnamed protein product	mobidb-lite	consensus disorder prediction
ATEG_01312	-0.454875	0.213032	0.319741	0.520431	-0.659669	0.130826	0.165317	0.833144	Zn(II)2Cys6 transcription factor	mobidb-lite	consensus disorder prediction
ATEG_01494	-0.802424	0.00527713	0.0243992	0.975539	-0.819682	0.0209125	-1.07852	0.277337	SAGA-like transcriptional regulatory complex subunit Spt3	PF00172	Fungal Zn(2)-Cys(6) binuclear cluster domain	IPR001138	Zn(2)-C6 fungal-type DNA-binding domain	GO:0000981|GO:0005634|GO:0006355|GO:0008270
ATEG_01499	-0.403893	0.649777	0.100232	0.876903	-0.683928	0.0759184	-1.59133	0.00251775	C6 transcription factor	PS00028	Zinc finger C2H2 type domain signature.	IPR013087	Zinc finger C2H2-type	GO:0003676
ATEG_01517	-1.37295	1.24e-07	0.659869	0.105081	-1.73291	1.7e-08	-1.19962	0.618452	hypothetical protein	PS00028	Zinc finger C2H2 type domain signature.	IPR013087	Zinc finger C2H2-type	GO:0003676
ATEG_01563	0.187802	0.67828	0.43415	0.379492	0.353132	0.537553	-0.229713	0.797149	hypothetical protein	PF00172	Fungal Zn(2)-Cys(6) binuclear cluster domain	IPR001138	Zn(2)-C6 fungal-type DNA-binding domain	GO:0000981|GO:0005634|GO:0006355|GO:0008270
ATEG_01619	-1.23251	6.76e-05	-0.109755	0.836996	-1.29601	0.000498646	-0.772138	0.690484	hypothetical protein	PF00319	SRF-type transcription factor (DNA-binding and dimerisation domain)	IPR002100	Transcription factor, MADS-box	GO:0003677|GO:0046983
ATEG_01662	-0.421632	0.279234	1.4114	0.318754	-0.831294	0.0519439	-1.89348	0.00124676	jumonji family transcription factor	SM00066		IPR001138	Zn(2)-C6 fungal-type DNA-binding domain	GO:0000981|GO:0005634|GO:0006355|GO:0008270
ATEG_01689	-0.386631	0.224275	-0.150753	0.772698	-0.103005	0.807169	0.336007	0.59561	cell pattern formation-associated protein stuA	PS00028	Zinc finger C2H2 type domain signature.	IPR013087	Zinc finger C2H2-type	GO:0003676
ATEG_01777	0.366756	0.311738	0.503375	0.23796	0.389317	0.464166	-0.00994102	0.9781	DNA repair and transcription factor Ada	PF00172	Fungal Zn(2)-Cys(6) binuclear cluster domain	IPR001138	Zn(2)-C6 fungal-type DNA-binding domain	GO:0000981|GO:0005634|GO:0006355|GO:0008270
ATEG_01811	1.09883	0.0627719	-0.516807	0.150246	1.06605	0.00273546	1.237	0.0245874	transcription factor btf3	PF00172	Fungal Zn(2)-Cys(6) binuclear cluster domain	IPR001138	Zn(2)-C6 fungal-type DNA-binding domain	GO:0000981|GO:0005634|GO:0006355|GO:0008270
ATEG_01812	0.55914	0.410995	0.00238422	0.9921	0.345603	0.47929	0.572546	0.410448	C6 transcription factor	cd12148	fungal_TF_MHR
ATEG_01982	1.17642	0.00148342	-0.403688	0.43229	1.0504	0.0355544	-0.74378	0.291157	fungal specific transcription factor domain protein	PF00172	Fungal Zn(2)-Cys(6) binuclear cluster domain	IPR001138	Zn(2)-C6 fungal-type DNA-binding domain	GO:0000981|GO:0005634|GO:0006355|GO:0008270
ATEG_01997	0.492858	0.129515	-0.320081	0.452227	0.795835	0.0882924	0.189745	0.904811	hypothetical protein	mobidb-lite	consensus disorder prediction
ATEG_02009	0.97286	0.0482226	-0.300448	0.621412	1.05009	0.0614852	0.963132	0.329024	C6 transcription factor	PF00176	SNF2 family N-terminal domain	IPR000330	SNF2-related, N-terminal domain	GO:0005524
ATEG_02054	-0.143726	0.671288	0.379798	0.330562	-0.0758943	0.874854	-0.158249	0.823068	C2H2 finger domain transcription factor	PF03366	YEATS family	IPR005033	YEATS	GO:0006355
ATEG_02073	-0.220215	0.554199	-0.380113	0.362153	-0.100325	0.827358	0.214929	0.823311	C6 transcription factor (Mut3)	mobidb-lite	consensus disorder prediction
ATEG_02113	0.0421251	0.955755	-0.0137734	0.988141	0.0922579	0.873466	-0.375928	0.643485	bZIP transcription factor (AtfA)	PF03850	Transcription factor Tfb4	IPR004600	TFIIH subunit Tfb4/GTF2H3	GO:0000439|GO:0006289|GO:0006355
ATEG_02205	-0.067889	0.81754	-0.554615	0.149242	0.0360255	0.948849	-0.169022	0.861511	hypothetical protein	PF04157	EAP30/Vps36 family	IPR040608	Snf8/Vps36 family
ATEG_02243	1.46062	1.58e-06	0.0718794	0.907424	0.745791	0.155733	0.100568	0.989646	C6 transcription factor	PF00172	Fungal Zn(2)-Cys(6) binuclear cluster domain	IPR001138	Zn(2)-C6 fungal-type DNA-binding domain	GO:0000981|GO:0005634|GO:0006355|GO:0008270
ATEG_02328	0.740117	0.00701544	-0.119963	0.792019	0.68501	0.0465744	0.985395	0.0946337	Zn(II)2Cys6 transcription factor	PS50048	Zn(2)-C6 fungal-type DNA-binding domain profile.	IPR001138	Zn(2)-C6 fungal-type DNA-binding domain	GO:0000981|GO:0005634|GO:0006355|GO:0008270
ATEG_02491	0.638698	0.0312186	-0.471238	0.217538	0.881574	0.0149774	0.327145	0.773683	unnamed protein product	PF00172	Fungal Zn(2)-Cys(6) binuclear cluster domain	IPR001138	Zn(2)-C6 fungal-type DNA-binding domain	GO:0000981|GO:0005634|GO:0006355|GO:0008270
ATEG_02521	0.392746	0.309136	-0.364656	0.366694	0.577921	0.186129	0.255668	0.785668	unnamed protein product	PF00096	Zinc finger, C2H2 type	IPR013087	Zinc finger C2H2-type	GO:0003676
ATEG_02532	1.48031	5.17e-05	-0.474418	0.195942	1.17821	0.0416891	1.79809	0.000261445	hypothetical protein	PF00249	Myb-like DNA-binding domain	IPR001005	SANT/Myb domain
ATEG_02582	-0.433423	0.370567	0.409304	0.425608	-0.246553	0.708277	0.964431	0.184865	HLH transcription factor EBF/Olf-1	PF00096	Zinc finger, C2H2 type	IPR013087	Zinc finger C2H2-type	GO:0003676
ATEG_02592	0.150488	0.816073	0.155646	0.936262	0.142202	0.754001	0.581182	0.355114	forkhead box protein L2	PF13181	Tetratricopeptide repeat	IPR019734	Tetratricopeptide repeat	GO:0005515
ATEG_02625	-1.37018	4.98e-06	0.00765646	1	-1.42572	0.000165472	-1.34599	0.18313	C6 transcription factor	PF01285	TEA/ATTS domain	IPR000818	TEA/ATTS domain	GO:0003700|GO:0006355
ATEG_02862	0.307948	0.248972	-0.120533	0.814804	0.495134	0.138775	0.80709	0.216306	C2H2 transcription factor	PF07716	Basic region leucine zipper	IPR004827	Basic-leucine zipper domain	GO:0003700|GO:0006355
ATEG_02928	-0.163137	0.768922	-0.161181	0.832646	-0.178941	0.660236	0.316341	0.694721	fungal specific transcription factor domain protein	PF00096	Zinc finger, C2H2 type	IPR013087	Zinc finger C2H2-type	GO:0003676
ATEG_02948	-0.511938	0.172268	0.440193	0.373857	-0.48684	0.340175	-0.349869	0.757531	GATA transcription factor LreB	PF00172	Fungal Zn(2)-Cys(6) binuclear cluster domain	IPR001138	Zn(2)-C6 fungal-type DNA-binding domain	GO:0000981|GO:0005634|GO:0006355|GO:0008270
ATEG_02975	0.502799	0.128723	-0.505679	0.204414	0.41222	0.35176	0.793759	0.312458	C6 transcription factor	mobidb-lite	consensus disorder prediction
ATEG_03051	0.970223	0.000814779	-0.248415	0.583686	1.01923	0.00583767	0.515074	0.545259	C6 zinc finger domain protein	PF00172	Fungal Zn(2)-Cys(6) binuclear cluster domain	IPR001138	Zn(2)-C6 fungal-type DNA-binding domain	GO:0000981|GO:0005634|GO:0006355|GO:0008270
ATEG_03085	0.825184	0.00477999	-0.0160401	0.979584	0.893203	0.0138983	0.708994	0.367595	Zn(II)2Cys6 transcription factor	PF00169	PH domain	IPR001849	Pleckstrin homology domain
ATEG_03131	-1.38455	3.17e-08	0.0969068	0.832545	-0.853123	0.00730406	-0.0630167	0.992678	C6 transcription factor	PF07716	Basic region leucine zipper	IPR004827	Basic-leucine zipper domain	GO:0003700|GO:0006355
ATEG_03141	-1.31297	1.26e-05	-0.864392	0.0252575	-1.05345	0.00527732	-0.620729	0.484385	conserved hypothetical protein	PF00172	Fungal Zn(2)-Cys(6) binuclear cluster domain	IPR001138	Zn(2)-C6 fungal-type DNA-binding domain	GO:0000981|GO:0005634|GO:0006355|GO:0008270
ATEG_03142	-0.553576	0.0742989	-0.195046	0.692148	-0.604295	0.115282	-0.421407	0.693819	bZIP transcription factor	PF00172	Fungal Zn(2)-Cys(6) binuclear cluster domain	IPR001138	Zn(2)-C6 fungal-type DNA-binding domain	GO:0000981|GO:0005634|GO:0006355|GO:0008270
ATEG_03152	0.0448555	0.936724	0.189054	0.720541	0.199326	0.69838	0.431403	0.553207	CP2 transcription factor	PF00320	GATA zinc finger	IPR000679	Zinc finger, GATA-type	GO:0006355|GO:0008270|GO:0043565
ATEG_03268	-0.781053	0.0039534	0.0686398	0.974937	-0.463204	0.206787	-0.385581	0.709203	heat shock transcription factor (hsf) shock transcription factor [Aspergillus oryzae 3.042]	PF00447	HSF-type DNA-binding	IPR000232	Heat shock factor (HSF)-type, DNA-binding	GO:0003700|GO:0006355|GO:0042025|GO:0043565
ATEG_03671	0.224006	0.498069	1.11117	0.000724936	-0.367725	0.461311	0.170082	0.825148	C6 transcription factor	PF00172	Fungal Zn(2)-Cys(6) binuclear cluster domain	IPR001138	Zn(2)-C6 fungal-type DNA-binding domain	GO:0000981|GO:0005634|GO:0006355|GO:0008270
ATEG_03672	0.607963	0.0529046	0.692204	0.0462925	0.118849	0.833543	-0.269879	0.795531	RNA polymerase III transcription factor (TF)IIIC subunit	PF07716	Basic region leucine zipper	IPR004827	Basic-leucine zipper domain	GO:0003700|GO:0006355
ATEG_03711	-0.609857	0.244089	0.466889	0.419345	-0.52189	0.435147			C2H2 transcription factor	PF03364	Polyketide cyclase / dehydrase and lipid transport	IPR005031	Coenzyme Q-binding protein COQ10, START domain
ATEG_03718	1.49206	0.000142868	0.990394	0.0169905	1.14058	0.0362357	-0.236158	0.756379	GATA-type sexual development transcription factor NsdD	PF00172	Fungal Zn(2)-Cys(6) binuclear cluster domain	IPR001138	Zn(2)-C6 fungal-type DNA-binding domain	GO:0000981|GO:0005634|GO:0006355|GO:0008270
ATEG_03734			1.58819	0.457133	1.06527	0.0616676			NF-X1 finger transcription factor	PF00172	Fungal Zn(2)-Cys(6) binuclear cluster domain	IPR001138	Zn(2)-C6 fungal-type DNA-binding domain	GO:0000981|GO:0005634|GO:0006355|GO:0008270
ATEG_03804	1.5754	7.33e-06	-0.648933	0.0819865	1.84381	1.14e-05	1.0747	0.134699	HLH transcription factor (PalcA)	PF00096	Zinc finger, C2H2 type	IPR013087	Zinc finger C2H2-type	GO:0003676
ATEG_03826	0.878437	0.00633558	-0.402614	0.356971	0.857635	0.0864553	-0.495308	0.47344	HLH transcription factor (GlcD gamma)	PF00172	Fungal Zn(2)-Cys(6) binuclear cluster domain	IPR001138	Zn(2)-C6 fungal-type DNA-binding domain	GO:0000981|GO:0005634|GO:0006355|GO:0008270
ATEG_03831	-0.177898	0.651943	-0.210554	0.74382	-0.599395	0.122682	0.570167	0.391563	HLH transcription factor	PF00172	Fungal Zn(2)-Cys(6) binuclear cluster domain	IPR001138	Zn(2)-C6 fungal-type DNA-binding domain	GO:0000981|GO:0005634|GO:0006355|GO:0008270
ATEG_03832	1.08112	0.022426	1.58729	0.0139875	-0.513785	0.237345	0.0181948	0.967181	hypothetical protein	PF04991	LicD family	IPR007074	LicD family
ATEG_03844	-1.76483	7.02e-12	-0.0911028	0.91221	-1.13943	0.000392012	-1.20608	0.175102	bZIP transcription factor FlbB	PS00463	Zn(2)-C6 fungal-type DNA-binding domain signature.	IPR001138	Zn(2)-C6 fungal-type DNA-binding domain	GO:0000981|GO:0005634|GO:0006355|GO:0008270
ATEG_03850	0.22364	0.506619	0.09525	0.854839	0.311911	0.472043	0.311343	0.689432	C6 transcription factor	PF00172	Fungal Zn(2)-Cys(6) binuclear cluster domain	IPR001138	Zn(2)-C6 fungal-type DNA-binding domain	GO:0000981|GO:0005634|GO:0006355|GO:0008270
ATEG_03907	-0.0521662	0.843788	-0.128402	0.805419	0.0698836	0.89467	0.1836	0.87751	C6 transcription factor (Leu3)	PF08567	TFIIH p62 subunit, N-terminal domain	IPR013876	TFIIH p62 subunit, N-terminal
ATEG_04039	0.609926	0.104348	-0.192839	0.726648	0.912314	0.0467531	0.0702663	0.996947	RNA polymerase II transcription factor	PS50088	Ankyrin repeat profile.	IPR002110	Ankyrin repeat	GO:0005515
ATEG_04043	-0.319996	0.32015	0.1205	0.79404	-0.937499	0.00525915	-0.243484	0.976822	bZIP transcription factor	PF00320	GATA zinc finger	IPR000679	Zinc finger, GATA-type	GO:0006355|GO:0008270|GO:0043565
ATEG_04118	-0.0499291	0.882802	0.661092	0.38487	-0.248234	0.647471	-1.20052	0.0401171	C6 transcription factor	PF00172	Fungal Zn(2)-Cys(6) binuclear cluster domain	IPR001138	Zn(2)-C6 fungal-type DNA-binding domain	GO:0000981|GO:0005634|GO:0006355|GO:0008270
ATEG_04124	-0.388474	0.280038	0.710726	0.345638	-0.4626	0.293895	-0.389472	0.690484	hypothetical protein	PF00382	Transcription factor TFIIB repeat	IPR013150	Transcription factor TFIIB, cyclin-like domain	GO:0017025
ATEG_04171	0.375767	0.260462	-0.0419737	0.953962	0.502707	0.263596	-0.404496	0.583429	C6 transcription factor	PF00046	Homeodomain	IPR001356	Homeobox domain	GO:0003677
ATEG_04204	-0.301739	0.46559	-1.68435	2.42e-06	-0.014075	0.967095	1.57607	0.00188809	C6 transcription factor	PF00010	Helix-loop-helix DNA-binding domain	IPR011598	Myc-type, basic helix-loop-helix (bHLH) domain	GO:0046983
ATEG_04358					-1.5219	0.00980318			PHD transcription factor
ATEG_04371			-1.56919	0.00020597			2.59386	0.000308165	C6 transcription factor	cd12148	fungal_TF_MHR
ATEG_04481	0.107645	0.668811	-0.349027	0.475609	-0.128227	0.750537	-0.101469	0.959844	hypothetical protein	PF00172	Fungal Zn(2)-Cys(6) binuclear cluster domain	IPR001138	Zn(2)-C6 fungal-type DNA-binding domain	GO:0000981|GO:0005634|GO:0006355|GO:0008270
ATEG_04506	-0.393246	0.187104	0.123333	0.852899	-0.673124	0.0718055	-0.127071	0.985262	RNA polymerase II transcription factor SIII (Elongin) subunit A	PF00096	Zinc finger, C2H2 type	IPR013087	Zinc finger C2H2-type	GO:0003676
ATEG_04542	-0.446718	0.422264	-0.278412	0.496649	-0.353373	0.320217	-0.268414	0.909986	transcription factor AbaA	PF00352	Transcription factor TFIID (or TATA-binding protein, TBP)	IPR000814	TATA-box binding protein	GO:0003677|GO:0006352
ATEG_04617	0.424718	0.122667	0.0678297	0.909115	0.112387	0.798224	0.231545	0.703555	C6 transcription factor	PS00036	Basic-leucine zipper (bZIP) domain signature.	IPR004827	Basic-leucine zipper domain	GO:0003700|GO:0006355
ATEG_04652	1.44585	9.36e-09	-0.336693	0.433378	1.61904	2.07e-07	2.18739	1.85e-05	C6 transcription factor	PF04516	CP2 transcription factor	IPR007604	CP2 transcription factor
ATEG_04658	0.698059	0.0103975	-1.10194	0.000151339	0.784759	0.0209311	0.9249	0.148762	nuclease domain-containing protein 1	PF00096	Zinc finger, C2H2 type	IPR013087	Zinc finger C2H2-type	GO:0003676
ATEG_04664	0.835563	0.000909361	-0.388632	0.288297	0.845311	0.00826927	2.02673	4.39e-05	Ran-specific GTPase-activating protein 1	PF00170	bZIP transcription factor	IPR004827	Basic-leucine zipper domain	GO:0003700|GO:0006355
ATEG_04739	1.18044	1.78e-05	-0.316798	0.431128	1.25318	0.000200621	1.25481	0.0282779	C2H2 transcription factor (Con7)	PF00250	Forkhead domain	IPR001766	Fork head domain	GO:0003700|GO:0006355|GO:0043565
ATEG_04740	0.700875	0.00830056	0.242796	0.675823	0.777929	0.0156009	0.922613	0.113787	transcription factor TFIIH subunit Tfb4	PF01636	Phosphotransferase enzyme family	IPR002575	Aminoglycoside phosphotransferase
ATEG_04743	0.226227	0.453461	-0.235513	0.604782	0.0696528	0.891911	0.990667	0.177075	C6 transcription factor	PF00172	Fungal Zn(2)-Cys(6) binuclear cluster domain	IPR001138	Zn(2)-C6 fungal-type DNA-binding domain	GO:0000981|GO:0005634|GO:0006355|GO:0008270
ATEG_04749			-0.247153	0.916363	0.0926394	0.913858	0.954418	0.602742	sexual development transcription factor RosA	PF00628	PHD-finger	IPR019787	Zinc finger, PHD-finger
ATEG_04761	-0.726124	0.0436157	0.28872	0.592784	-0.549227	0.235959	0.227199	0.817081	CBF/NF-Y family transcription factor	PF00076	RNA recognition motif. (a.k.a. RRM, RBD, or RNP domain)	IPR000504	RNA recognition motif domain	GO:0003676
ATEG_04762	-0.305622	0.316335	0.233253	0.579256	-0.114137	0.795287	0.0775648	0.899775	RNA polymerase III transcription factor TFIIIC subunit (Tfc4)	SM00906		IPR007219	Transcription factor domain, fungi	GO:0003677|GO:0005634|GO:0006351|GO:0008270
ATEG_04779	0.120098	0.677578	-0.0590639	0.947525	0.374504	0.425038	0.539481	0.429286	unnamed protein product	PF03131	bZIP Maf transcription factor	IPR004826	Basic leucine zipper domain, Maf-type	GO:0003677|GO:0005634|GO:0006355
ATEG_04790	-2.15457	1.06e-08			-1.98621	3.64e-05	-3.30241	0.211577	C6 transcription factor	SM00906		IPR007219	Transcription factor domain, fungi	GO:0003677|GO:0005634|GO:0006351|GO:0008270
ATEG_04894	-0.792976	0.00390101	0.479874	0.191565	-1.09712	0.000795759	-1.32992	0.0228876	cellobiose response regulator	mobidb-lite	consensus disorder prediction
ATEG_04909	1.1763	0.000228868	0.000894326	0.999772	0.922153	0.0308776	0.0742222	0.986921	C6 transcription factor	PF00172	Fungal Zn(2)-Cys(6) binuclear cluster domain	IPR001138	Zn(2)-C6 fungal-type DNA-binding domain	GO:0000981|GO:0005634|GO:0006355|GO:0008270
ATEG_04997	0.0877623	0.789562	0.196508	0.756101	0.1215	0.842746	-0.117435	0.899434	bZIP transcription factor	PF00172	Fungal Zn(2)-Cys(6) binuclear cluster domain	IPR001138	Zn(2)-C6 fungal-type DNA-binding domain	GO:0000981|GO:0005634|GO:0006355|GO:0008270
ATEG_05044	0.435751	0.191873	0.459636	0.285124	0.394211	0.420492	-0.576195	0.446307	C6 transcription factor (PrnA)	PF00172	Fungal Zn(2)-Cys(6) binuclear cluster domain	IPR001138	Zn(2)-C6 fungal-type DNA-binding domain	GO:0000981|GO:0005634|GO:0006355|GO:0008270
ATEG_05057	1.07475	0.0440857	-2.38059	0.000164403	0.431306	0.755828	0.753429	0.614092	C6 transcription factor	PF00172	Fungal Zn(2)-Cys(6) binuclear cluster domain	IPR001138	Zn(2)-C6 fungal-type DNA-binding domain	GO:0000981|GO:0005634|GO:0006355|GO:0008270
ATEG_05112	0.246573	0.625943	0.143409	0.807247	0.237042	0.760065	-0.474263	0.573669	GATA transcription factor LreA	PF00172	Fungal Zn(2)-Cys(6) binuclear cluster domain	IPR001138	Zn(2)-C6 fungal-type DNA-binding domain	GO:0000981|GO:0005634|GO:0006355|GO:0008270
ATEG_05161	0.645076	0.0131776	-0.243975	0.554631	0.502368	0.408663	1.04468	0.0702626	hypothetical protein	PF00170	bZIP transcription factor	IPR004827	Basic-leucine zipper domain	GO:0003700|GO:0006355
ATEG_05199	0.801386	0.329396	1.15165	0.374921	-0.399748	0.497917	-0.351069	0.761037	hypothetical protein	PF00172	Fungal Zn(2)-Cys(6) binuclear cluster domain	IPR001138	Zn(2)-C6 fungal-type DNA-binding domain	GO:0000981|GO:0005634|GO:0006355|GO:0008270
ATEG_05241	0.262767	0.440984	-0.0242229	0.969748	0.0439371	0.956721	0.260027	0.840777	Transcription activator of gluconeogenesis acuK	PF00172	Fungal Zn(2)-Cys(6) binuclear cluster domain	IPR001138	Zn(2)-C6 fungal-type DNA-binding domain	GO:0000981|GO:0005634|GO:0006355|GO:0008270
ATEG_05248	-0.589349	0.135296	-0.399584	0.642892	0.439257	0.671851	-0.491142	0.517884	conserved hypothetical protein	PF05920	Homeobox KN domain	IPR008422	Homeobox KN domain	GO:0003677|GO:0006355
ATEG_05255	1.01653	0.000636734	-0.179305	0.709717	0.942807	0.0133724	0.315715	0.828113	C6 transcription factor	PF00172	Fungal Zn(2)-Cys(6) binuclear cluster domain	IPR001138	Zn(2)-C6 fungal-type DNA-binding domain	GO:0000981|GO:0005634|GO:0006355|GO:0008270
ATEG_05308	0.274456	0.526176	0.208346	0.639463	-0.543177	0.244405	-0.339065	0.958415	hypothetical protein	PF00096	Zinc finger, C2H2 type	IPR013087	Zinc finger C2H2-type	GO:0003676
ATEG_05321	-0.321598	0.337064	0.206343	0.667037	-0.0840402	0.871003	0.266069	0.734863	conserved hypothetical protein	PF17121	Zinc finger, C3HC4 type (RING finger)	IPR001841	Zinc finger, RING-type
ATEG_05392	-1.49643	2.87e-09	-0.107373	0.837466	-1.23869	6.83e-05	-0.597307	0.805146	Zn(II)2Cys6 transcription factor	PF00172	Fungal Zn(2)-Cys(6) binuclear cluster domain	IPR001138	Zn(2)-C6 fungal-type DNA-binding domain	GO:0000981|GO:0005634|GO:0006355|GO:0008270
ATEG_05422	-0.460308	0.463354	-0.254264	0.67286	-0.701598	0.181622	-0.579711	0.428216	Msn2	PF00172	Fungal Zn(2)-Cys(6) binuclear cluster domain	IPR001138	Zn(2)-C6 fungal-type DNA-binding domain	GO:0000981|GO:0005634|GO:0006355|GO:0008270
ATEG_05424	0.768193	0.125751	-0.0316361	0.981681	0.853991	0.168644	0.495209	0.686748	hypothetical protein	PF07716	Basic region leucine zipper	IPR004827	Basic-leucine zipper domain	GO:0003700|GO:0006355
ATEG_05575	-1.90429	5.02e-10	0.332272	0.402674	-1.33408	1.96e-05	-1.00707	0.129335	HLH transcription factor (Hpa3)	PF07716	Basic region leucine zipper	IPR004827	Basic-leucine zipper domain	GO:0003700|GO:0006355
ATEG_05582	1.98034	1.09e-12	0.156124	0.763999	2.59098	7.68e-15	0.328736	0.73825	conserved hypothetical protein	SM00906		IPR007219	Transcription factor domain, fungi	GO:0003677|GO:0005634|GO:0006351|GO:0008270
ATEG_05602	0.661531	0.0451643	0.608046	0.529112	0.415192	0.361539	-0.381281	0.629852	transcription factor (SPT8)	SM00906		IPR007219	Transcription factor domain, fungi	GO:0003677|GO:0005634|GO:0006351|GO:0008270
ATEG_05632	0.419151	0.159633	0.177165	0.702637	0.387793	0.322928	0.447357	0.614668	unnamed protein product	PF00808	Histone-like transcription factor (CBF/NF-Y) and archaeal histone	IPR003958	Transcription factor CBF/NF-Y/archaeal histone domain
ATEG_05658	-0.89414	0.00402291	-0.77246	0.0280931	-0.415676	0.331221	-0.0991945	0.927381	HLH transcription factor	PF00096	Zinc finger, C2H2 type	IPR013087	Zinc finger C2H2-type	GO:0003676
ATEG_05681	-1.12893	0.000172631	-0.238657	0.644319	-1.01555	0.00642236	-0.343239	0.745521	bZIP transcription factor (MetR)	mobidb-lite	consensus disorder prediction
ATEG_05721	-0.348163	0.32198	-0.193268	0.73179	-0.610878	0.183106	-0.353503	0.666128	C6 transcription factor (UaY)	PF00172	Fungal Zn(2)-Cys(6) binuclear cluster domain	IPR001138	Zn(2)-C6 fungal-type DNA-binding domain	GO:0000981|GO:0005634|GO:0006355|GO:0008270
ATEG_05796	0.746566	0.0262872	-0.303482	0.52567	0.934431	0.0257472	-0.178554	0.804511	mannosylphosphorylation protein (Mnn4)	PF00172	Fungal Zn(2)-Cys(6) binuclear cluster domain	IPR001138	Zn(2)-C6 fungal-type DNA-binding domain	GO:0000981|GO:0005634|GO:0006355|GO:0008270
ATEG_05865	1.1837	0.000380064	-0.684317	0.0735722	0.943395	0.0350827	-0.355958	0.692442	bZIP transcription factor	SM00906		IPR007219	Transcription factor domain, fungi	GO:0003677|GO:0005634|GO:0006351|GO:0008270
ATEG_05881	-2.27742	1.63e-11	-0.239303	0.735944	-1.68689	5.57e-05	-0.909164	0.286274	HLH DNA binding protein (Penr2)	PF00172	Fungal Zn(2)-Cys(6) binuclear cluster domain	IPR001138	Zn(2)-C6 fungal-type DNA-binding domain	GO:0000981|GO:0005634|GO:0006355|GO:0008270
ATEG_05926	2.6582	3.82e-18	1.01671	0.114381	0.885878	0.0858907	0.846943	0.309474	GATA transcription factor (AreB)	PF00172	Fungal Zn(2)-Cys(6) binuclear cluster domain	IPR001138	Zn(2)-C6 fungal-type DNA-binding domain	GO:0000981|GO:0005634|GO:0006355|GO:0008270
ATEG_05949	-0.197116	0.623777	0.122853	0.854043	-0.108549	0.844671	-0.067727	0.975804	forkhead transcription factor Fkh1/2	Coil
ATEG_05954	-1.01826	0.0150746	-0.501313	0.339054	-1.0438	0.0547786	-0.057871	0.994811	GATA factor SREP	SM00906		IPR007219	Transcription factor domain, fungi	GO:0003677|GO:0005634|GO:0006351|GO:0008270
ATEG_05965	-0.608966	0.16898	-0.99196	0.00181507	-0.690812	0.0532745	-0.240276	0.866912	C6 transcription factor	mobidb-lite	consensus disorder prediction
ATEG_06183	1.36642	1.94e-06	1.06042	0.000945554	0.177215	0.737983	-0.695174	0.321257	C6 transcription factor	PF00172	Fungal Zn(2)-Cys(6) binuclear cluster domain	IPR001138	Zn(2)-C6 fungal-type DNA-binding domain	GO:0000981|GO:0005634|GO:0006355|GO:0008270
ATEG_06429	1.19714	9.92e-05	-0.403717	0.541203	0.98597	0.0180952	-0.333849	0.663644	Zn(II)2Cys6 transcription factor	PF00172	Fungal Zn(2)-Cys(6) binuclear cluster domain	IPR001138	Zn(2)-C6 fungal-type DNA-binding domain	GO:0000981|GO:0005634|GO:0006355|GO:0008270
ATEG_06542	0.353748	0.203693	0.800481	0.0107257	0.413533	0.251654	-0.925272	0.118244	C6 finger domain protein	PF00565	Staphylococcal nuclease homologue	IPR016071	Staphylococcal nuclease (SNase-like), OB-fold
ATEG_06559	0.773438	0.0468295	0.443745	0.341965	0.481242	0.400799	-0.289981	0.712414	C6 transcription factor (AmdR)	PF00400	WD domain, G-beta repeat	IPR001680	WD40 repeat	GO:0005515
ATEG_06629	0.790663	0.0163987	-0.359607	0.404969	0.515969	0.439168	-0.193945	0.800737	transcription factor smp1	PF00172	Fungal Zn(2)-Cys(6) binuclear cluster domain	IPR001138	Zn(2)-C6 fungal-type DNA-binding domain	GO:0000981|GO:0005634|GO:0006355|GO:0008270
ATEG_06703	-0.94088	0.0149634	1.09766	0.0135641	-0.672942	0.170569	0.0437827	1	Zn(II)2Cys6 transcription factor	PF08164	Apoptosis-antagonizing transcription factor, C-terminal	IPR012617	Apoptosis-antagonizing transcription factor, C-terminal	GO:0005634
ATEG_06717	-0.0632796	0.882802	-0.1577	0.75921	0.196376	0.634886	0.550672	0.410974	bZIP transcription factor	PF00170	bZIP transcription factor	IPR004827	Basic-leucine zipper domain	GO:0003700|GO:0006355
ATEG_06724	1.91891	0.0480217	0.199042	0.660228	1.16312	0.0072683	0.0909788	0.973371	hypothetical protein	PF00172	Fungal Zn(2)-Cys(6) binuclear cluster domain	IPR001138	Zn(2)-C6 fungal-type DNA-binding domain	GO:0000981|GO:0005634|GO:0006355|GO:0008270
ATEG_06728	0.655222	0.0696166	-0.538327	0.187732	0.931187	0.0299497	0.677474	0.395722	hypothetical protein	PF00172	Fungal Zn(2)-Cys(6) binuclear cluster domain	IPR001138	Zn(2)-C6 fungal-type DNA-binding domain	GO:0000981|GO:0005634|GO:0006355|GO:0008270
ATEG_06774	-0.0373508	0.977733	0.152958	0.813664	-0.440646	0.235099	1.05808	0.0793377	AflR-like C6 zinc cluster transcription factor [Aspergillus fumigatus Af293] &gt;gi|66851246|gb|EAL91572.1| AflR-like C6 zinc cluster transcription factor, putative [Aspergillus fumigatus Af293]	PS50048	Zn(2)-C6 fungal-type DNA-binding domain profile.	IPR001138	Zn(2)-C6 fungal-type DNA-binding domain	GO:0000981|GO:0005634|GO:0006355|GO:0008270
ATEG_06883	-0.500173	0.193089	-0.037878	0.976392	-0.651606	0.237686	-0.135403	0.9781	C6 transcription factor	PF00172	Fungal Zn(2)-Cys(6) binuclear cluster domain	IPR001138	Zn(2)-C6 fungal-type DNA-binding domain	GO:0000981|GO:0005634|GO:0006355|GO:0008270
ATEG_06908	-0.941882	0.00100596	-0.181299	0.708583	-0.958855	0.00548248	-0.605608	0.47511	Zn(II)2Cys6 transcription factor acuM	PF00172	Fungal Zn(2)-Cys(6) binuclear cluster domain	IPR001138	Zn(2)-C6 fungal-type DNA-binding domain	GO:0000981|GO:0005634|GO:0006355|GO:0008270
ATEG_06925	-0.628102	0.0359496	0.105596	0.849534	-0.527751	0.172627	-0.241486	0.785668	PHD transcription factor (Rum1)	PF00170	bZIP transcription factor	IPR004827	Basic-leucine zipper domain	GO:0003700|GO:0006355
ATEG_07009	-0.25522	0.5116	0.267675	0.575544	-0.307332	0.523031	0.133731	0.880078	C6 transcription factor	PF15963	Myb DNA-binding like	IPR039467	Transcription factor TFIIIB component B'', Myb domain
ATEG_07219	-0.670311	0.0931346	-1.16481	0.000170738	-0.526302	0.296599	0.363751	0.669371	TPA: putative CCAAT-box-binding transcription factor	PF00172	Fungal Zn(2)-Cys(6) binuclear cluster domain	IPR001138	Zn(2)-C6 fungal-type DNA-binding domain	GO:0000981|GO:0005634|GO:0006355|GO:0008270
ATEG_07240	-0.0514486	0.949367	-0.152344	0.749565	-0.0185883	0.955152	-0.0796307	0.922229	bZIP transcription factor (LziP)	PF00319	SRF-type transcription factor (DNA-binding and dimerisation domain)	IPR002100	Transcription factor, MADS-box	GO:0003677|GO:0046983
ATEG_07264	-0.535079	0.157465	0.425623	0.24237	-0.189501	0.64241	-0.0275555	0.946433	C2H2 transcription factor	PF00320	GATA zinc finger	IPR000679	Zinc finger, GATA-type	GO:0006355|GO:0008270|GO:0043565
ATEG_07277	0.138018	0.894184	-1.14712	0.408147	0.556063	0.522418	0.753314	0.785668	GATA transcription factor	mobidb-lite	consensus disorder prediction
ATEG_07430	-0.92232	0.0113953	-0.022929	0.976545	-0.429319	0.402047	-0.630161	0.546038	transcription factor TFIIA complex subunit Toa1	PF13923	Zinc finger, C3HC4 type (RING finger)
ATEG_07471	-0.0566941	0.909466	-0.0237607	0.976232	0.123509	0.763769	0.600497	0.44075	C6 transcription factor	PF00808	Histone-like transcription factor (CBF/NF-Y) and archaeal histone	IPR003958	Transcription factor CBF/NF-Y/archaeal histone domain
ATEG_07522	1.11569	0.0084607	0.899303	0.466173	0.994417	0.229207	-0.918432	0.312964	homeobox transcription factor	mobidb-lite	consensus disorder prediction
ATEG_07616	-0.384016	0.270036	0.0979814	0.870906	-0.187813	0.718674	0.24903	0.795531	transcription factor SipA3	PF00808	Histone-like transcription factor (CBF/NF-Y) and archaeal histone	IPR003958	Transcription factor CBF/NF-Y/archaeal histone domain
ATEG_07714	-0.421536	0.124857	0.0837134	0.876831	-0.514028	0.278356	-0.66984	0.743824	transcription factor hoxa13	PF00320	GATA zinc finger	IPR000679	Zinc finger, GATA-type	GO:0006355|GO:0008270|GO:0043565
ATEG_07734	0.891565	0.00182071	0.316984	0.452578	0.875223	0.0347874	0.492277	0.621666	transcription factor RfeD	PS51299	APSES-type HTH DNA-binding domain profile.	IPR003163	Transcription regulator HTH, APSES-type DNA-binding domain
ATEG_07811	0.357763	0.234837	-0.278519	0.518774	0.0886268	0.852277	0.545731	0.45711	Zn(II)2Cys6 transcription factor	mobidb-lite	consensus disorder prediction
ATEG_07814	0.432081	0.131277	-0.0753418	0.891465	0.528225	0.147305	0.211529	0.763917	C6 transcription factor	PF02045	CCAAT-binding transcription factor (CBF-B/NF-YA) subunit B	IPR001289	Nuclear transcription factor Y subunit A	GO:0003700|GO:0006355
ATEG_07822	0.30512	0.321622	0.181413	0.842199	0.400721	0.64166	0.638905	0.484689	conserved hypothetical protein	PF00010	Helix-loop-helix DNA-binding domain	IPR011598	Myc-type, basic helix-loop-helix (bHLH) domain	GO:0046983
ATEG_07901	0.0741769	0.882273	0.0125782	0.978677	0.33887	0.378874	-0.00925378	0.98957	CCAAT-box-binding transcription factor	PF00170	bZIP transcription factor	IPR004827	Basic-leucine zipper domain	GO:0003700|GO:0006355
ATEG_07979	0.784582	0.0632597	-0.232259	0.71336	0.536692	0.396293	0.14523	0.934846	C2H2 type zinc finger domain protein	PF04056	Ssl1-like	IPR007198	Ssl1-like
ATEG_07994	-0.346714	0.475073	0.30726	0.608159	-0.313202	0.439391	-0.114987	0.927271	C6 transcription factor	PF00010	Helix-loop-helix DNA-binding domain	IPR011598	Myc-type, basic helix-loop-helix (bHLH) domain	GO:0046983
ATEG_08014	-0.90812	0.00426534	0.381398	0.365055	-0.969629	0.0128393	-0.245238	0.929654	bZIP transcription factor HacA	mobidb-lite	consensus disorder prediction
ATEG_08071	-0.158178	0.557761	0.658169	0.616847	-0.270792	0.474083	-0.179128	0.967772	MYB family conidiophore development protein FlbD	PF02928	C5HC2 zinc finger	IPR004198	Zinc finger, C5HC2-type
ATEG_08156	-0.680703	0.00992218	0.179386	0.702637	-0.635578	0.0678234	-0.452343	0.81413	Zn(II)2Cys6 transcription factor	PF00010	Helix-loop-helix DNA-binding domain	IPR011598	Myc-type, basic helix-loop-helix (bHLH) domain	GO:0046983
ATEG_08324	0.554031	0.0669435	-0.514691	0.161845	0.49776	0.191224	0.335064	0.741863	vacuolar-sorting protein dot2	PS50888	Myc-type, basic helix-loop-helix (bHLH) domain profile.	IPR011598	Myc-type, basic helix-loop-helix (bHLH) domain	GO:0046983
ATEG_08424	-6.23829	7.95e-26			-6.0279	2.9e-17	-1.79146	0.221938	C6 transcription factor	PF00172	Fungal Zn(2)-Cys(6) binuclear cluster domain	IPR001138	Zn(2)-C6 fungal-type DNA-binding domain	GO:0000981|GO:0005634|GO:0006355|GO:0008270
ATEG_08429	-1.16008	0.00735886			-1.18911	0.0420056	-0.758481	0.445017	homeobox transcription factor (RfeB)	PF00172	Fungal Zn(2)-Cys(6) binuclear cluster domain	IPR001138	Zn(2)-C6 fungal-type DNA-binding domain	GO:0000981|GO:0005634|GO:0006355|GO:0008270
ATEG_08537	-0.363862	0.221052	-0.213111	0.642871	-0.0833164	0.837364	-0.947059	0.177739	unnamed protein product	mobidb-lite	consensus disorder prediction
ATEG_08685	1.03705	0.000381262	-0.490118	0.24167	0.968782	0.0115344	0.0963117	0.931995	C6 transcription factor	PF00172	Fungal Zn(2)-Cys(6) binuclear cluster domain	IPR001138	Zn(2)-C6 fungal-type DNA-binding domain	GO:0000981|GO:0005634|GO:0006355|GO:0008270
ATEG_08746	0.331988	0.307353	-0.54897	0.121986	0.3985	0.321221	0.239434	0.835673	protein bfr2	SM00906		IPR007219	Transcription factor domain, fungi	GO:0003677|GO:0005634|GO:0006351|GO:0008270
ATEG_08748	-0.0822923	0.72981	-0.223494	0.636596	-0.0556206	0.916388	0.296934	0.751391	Myb-like transcription factor	PF03131	bZIP Maf transcription factor	IPR004826	Basic leucine zipper domain, Maf-type	GO:0003677|GO:0005634|GO:0006355
ATEG_08838	-0.887356	0.0529046	-0.577441	0.266396	-0.111919	0.891967	0.744416	0.328498	C6 transcription factor	PS00463	Zn(2)-C6 fungal-type DNA-binding domain signature.	IPR001138	Zn(2)-C6 fungal-type DNA-binding domain
ATEG_08959	0.53502	0.340594	1.09381	0.00558684	0.055583	0.93997	0.414399	0.640493	hypothetical protein	PF00320	GATA zinc finger	IPR000679	Zinc finger, GATA-type	GO:0006355|GO:0008270|GO:0043565
ATEG_08961	-2.02219	5.59e-15	0.853591	0.160327	-2.06233	7.69e-11	-1.71596	0.597094	C2H2 transcription factor	mobidb-lite	consensus disorder prediction
ATEG_09030	-2.21188	2.99e-13	-0.610945	0.164159	-1.79941	9.9e-07	-1.3284	0.167216	C6 transcription factor	SM00906		IPR007219	Transcription factor domain, fungi	GO:0003677|GO:0005634|GO:0006351|GO:0008270
ATEG_09148	0.571892	0.201297	-0.410563	0.43459	0.387439	0.528752	-0.22201	0.837464	C6 transcription factor	G3DSA:4.10.240.10		IPR036864	Zn(2)-C6 fungal-type DNA-binding domain superfamily	GO:0000981|GO:0005634|GO:0006355|GO:0008270
ATEG_09222	-0.349563	0.468727	-0.279232	0.672593	-0.493714	0.423526	-0.251085	0.818659	homeobox and C2H2 transcription factor	PF09734	RNA polymerase III transcription factor (TF)IIIC subunit HTH domain	IPR019136	Transcription factor IIIC subunit 5, HTH domain
ATEG_09236	0.739526	0.0151189	-0.0130517	0.985975	0.910877	0.01776	0.493973	0.603176	unnamed protein product	PF00172	Fungal Zn(2)-Cys(6) binuclear cluster domain	IPR001138	Zn(2)-C6 fungal-type DNA-binding domain	GO:0000981|GO:0005634|GO:0006355|GO:0008270
ATEG_09249	-1.82665	1.04e-10	-0.60374	0.114121	-1.52581	6.17e-06	-1.66599	0.00237241	unnamed protein product	PF00172	Fungal Zn(2)-Cys(6) binuclear cluster domain	IPR001138	Zn(2)-C6 fungal-type DNA-binding domain	GO:0000981|GO:0005634|GO:0006355|GO:0008270
ATEG_09346	-0.563452	0.0922911	0.597933	0.134659	-0.324505	0.495536	-1.72939	0.00229268	bZIP transcription factor	PF00172	Fungal Zn(2)-Cys(6) binuclear cluster domain	IPR001138	Zn(2)-C6 fungal-type DNA-binding domain	GO:0000981|GO:0005634|GO:0006355|GO:0008270
ATEG_09390	0.263281	0.500576	-1.10522	0.00155818	0.386587	0.647144	-1.66678	0.356274	hypothetical protein	PF00096	Zinc finger, C2H2 type	IPR013087	Zinc finger C2H2-type	GO:0003676
ATEG_09397	-0.938243	0.00667559	-0.0960869	0.90383	-0.687661	0.131495	-0.712648	0.366113	C2H2 transcription factor (Sfp1)	PF02805	Metal binding domain of Ada	IPR004026	Ada DNA repair, metal-binding	GO:0003677|GO:0006281|GO:0006355|GO:0008168|GO:0008270
ATEG_09416	0.582879	0.0586266	0.19627	0.675971	0.614664	0.166073	-0.383546	0.626177	fungal specific transcription factor domain protein	PF02257	RFX DNA-binding domain	IPR003150	DNA-binding RFX-type winged-helix domain	GO:0003677|GO:0006355
ATEG_09469	-0.139173	0.810362	-0.769723	0.0203673	-0.01337	0.96632	0.0206511	0.973371	fungal specific transcription factor domain protein	PF00250	Forkhead domain	IPR001766	Fork head domain	GO:0003700|GO:0006355|GO:0043565
ATEG_09543	-0.509265	0.148951	-0.0242195	0.975926	-0.343858	0.395577	-0.0574462	0.937409	RNA polymerase II transcription factor B subunit 3	PF00172	Fungal Zn(2)-Cys(6) binuclear cluster domain	IPR001138	Zn(2)-C6 fungal-type DNA-binding domain	GO:0000981|GO:0005634|GO:0006355|GO:0008270
ATEG_09550	0.728217	0.148612	-0.0592157	0.965029	0.44828	0.304505	0.620609	0.498069	C6 transcription factor	PF00172	Fungal Zn(2)-Cys(6) binuclear cluster domain	IPR001138	Zn(2)-C6 fungal-type DNA-binding domain	GO:0000981|GO:0005634|GO:0006355|GO:0008270
ATEG_09565	0.34142	0.281412	-1.26494	3.2e-05	0.759439	0.0404549	0.813684	0.153073	C2H2 transcription factor	PF10224	Short coiled-coil protein	IPR019357	Short coiled-coil protein
ATEG_09592	-1.72504	1.85e-10	0.806118	0.0194115	-1.59808	1.22e-06	-1.42934	0.31597	CCAAT-binding factor complex subunit HapE	SSF46689		IPR009057	Homeobox-like domain superfamily	GO:0003677
ATEG_09595	1.12943	0.00337548	-0.542695	0.113722	1.19598	0.000293221	1.39044	0.0116589	C6 transcription factor	PF00249	Myb-like DNA-binding domain	IPR001005	SANT/Myb domain
ATEG_09634	-0.058184	0.948365	-0.125689	0.784727	-0.384635	0.363356	-0.0440391	0.98746	C6 transcription factor	PS51299	APSES-type HTH DNA-binding domain profile.	IPR003163	Transcription regulator HTH, APSES-type DNA-binding domain
ATEG_09658	0.198102	0.7045	-0.134649	0.863995	0.440989	0.508264	0.248146	0.875364	GATA transcription factor	mobidb-lite	consensus disorder prediction
ATEG_09671	-1.08252	0.0954943			-0.742447	0.258276	-0.923622	0.308492	APSES transcription factor	SM00906		IPR007219	Transcription factor domain, fungi	GO:0003677|GO:0005634|GO:0006351|GO:0008270
ATEG_09682	-0.49922	0.0534718	0.455671	0.484241	-0.270751	0.560072	-0.134285	0.94222	hypothetical protein	PF02002	TFIIE alpha subunit	IPR024550	TFIIEalpha/SarR/Rpc3 HTH domain
ATEG_09699	1.12064	0.000183158	-0.518889	0.15452	1.40352	9.85e-05	1.9799	0.000238004	transcription factor TFIIIB complex subunit Brf1	TMhelix	Region of a membrane-bound protein predicted to be embedded in the membrane.
ATEG_09811	0.22161	0.506726	0.0124795	0.987272	0.200957	0.653387	0.143018	0.908928	RFX family transcription factor	PF00447	HSF-type DNA-binding	IPR000232	Heat shock factor (HSF)-type, DNA-binding	GO:0003700|GO:0006355|GO:0042025|GO:0043565
ATEG_09847	-1.26713	3.99e-07	0.733909	0.0219542	-1.54505	1.12e-06	-1.5365	0.41442	homeobox transcription factor	mobidb-lite	consensus disorder prediction
ATEG_10060	-1.63584	7.53e-07	0.0264091	0.985975	-1.21142	0.00395643	-0.946759	0.245549	unnamed protein product
ATEG_10323	4.02063	3.64e-22	-3.12241	1.03e-26	2.36743	0.129652	5.53022	5.62e-23	conserved hypothetical protein	PF00172	Fungal Zn(2)-Cys(6) binuclear cluster domain	IPR001138	Zn(2)-C6 fungal-type DNA-binding domain	GO:0000981|GO:0005634|GO:0006355|GO:0008270
ATEG_10358	1.82535	4.76e-05	-0.0763693	0.920719	2.01092	0.032836	2.06699	0.000290434	TFIIH basal transcription factor complex p47 subunit	PF00172	Fungal Zn(2)-Cys(6) binuclear cluster domain	IPR001138	Zn(2)-C6 fungal-type DNA-binding domain	GO:0000981|GO:0005634|GO:0006355|GO:0008270
